# Supplementary material for: Polymer-assisted crystal growth regulation and defect passivation for high-performance flexible solar-blind photodetectors based on copper-based halides
Source: Royal Society of Chemistry journal article supplement (doi:10.1039/d3tc04308h), 2024-01-01
Supplement: d3tc04308h1.pdf [file d3tc04308h1.pdf]

# Polymer-Assisted Crystal Growth Regulation and Defect Passivation for High-Performance Flexible Solar-blind Photodetector based on Copper-Based Halides

*Chengjun Liu,<sup>a</sup> Yuyi Zhang,<sup>a</sup> Lixi Wang,<sup>b</sup> Jianhua Chang,<sup>b</sup> Qing Li,<sup>a</sup> Xiaobing Zhang,<sup>a</sup> Byung Seong Bae,<sup>c</sup> Omolola Esther Fayemi,<sup>d</sup> Xiaobao Xu,<sup>a</sup> Jiangyong Pan,<sup>b\*</sup> Jing Chen,<sup>a\*</sup> Wei Lei<sup>a</sup>*

*<sup>a</sup>Joint International Research Laboratory of Information Display and Visualization, School of Electronic Science and Engineering, Southeast University, Nanjing, China*

*<sup>b</sup>School of Electronic and Information Engineering, Nanjing University of Information Science & Technology, Nanjing, China*

*<sup>c</sup>Department of Electronics & Display Engineering Hoseo University, Hoseo Ro 79, Asan city, Chungnam 31499, Republic of Korea*

*<sup>d</sup>Department of Chemistry, School of Mathematics and Physical Sciences Faculty of Natural and Agricultural Sciences North-West University, Mafikeng Campus, Private Bag X2046, Mmabatho 2735, South Africa*

## Experiment Section

### *Material:*

CsI ( $\geq 99.9\%$ ), CuI ( $\geq 99.999\%$ ), poly(vinylpyrrolidone) (PVP) ( $M_w \sim 40000$ ), poly(4-vinylphenol), polyethylene oxide (PEO) and polystyrene (PS) were purchased from Sigma-Aldrich. Dimethyl sulfoxide ( $\geq 99.7\%$ ), N, N-Dimethylformamide ( $\geq 99.8\%$ ) and toluene (Analytical Reagent) were purchased from Merck. All the chemicals were used without further purification.

### *Preparation of Polymer- $Cs_3Cu_2I_5$ Precursor Solution:*

0.75 M  $Cs_3Cu_2I_5$  precursor was prepared by dissolving CsI and CuI into a mixture of DMF and DMSO (1:1 v/v). The mixture was stirred at 70 °C for 12 h until completely dissolved. Thereafter, a colorless precursor solution was obtained by filtering the crude solution through a PTFE filter (0.45  $\mu\text{m}$ ). Different amount of polymers was added into the precursor solution to prepare PVP-  $Cs_3Cu_2I_5$  precursor solution.

### *Preparation of Polymer- $Cs_3Cu_2I_5$ Device:*

Firstly, the 100 mL as-prepared precursor solution was spin-coated on the quartz substrates in the argon-filled glovebox, involving a low-speed (500 rpm, 5 s) and high-speed (3000 rpm, 60 s) spinning process. A wet layer of Polymer- $Cs_3Cu_2I_5$  film was formed in the first 45 seconds. Then, 100  $\mu\text{L}$  of toluene as an anti-solvent was dropped onto the top of the spinning layer to promote a fast crystallization for film formation. Finally, the sample was annealed on a hotplate at 100°C for 5 min to evaporate the solvent and form the compact Polymer- $Cs_3Cu_2I_5$  films.

*Characterizations:*

PL, PL excitation (PLE), PLQY, and time-resolved PL (TRPL) spectra were measured via an Edinburgh instruments FS5 spectrometer equipped with an integrating sphere. The chemical compositions and film morphology were analyzed with an energy-dispersive spectrometer (EDS)-equipped field-emission scanning electron microscope (SEM) JEOL-7800F. X-ray diffraction (XRD) measurement was carried out using a Bruker D8 Advance. Responsivity and I–V curve was measured by a Keithley 2400 semiconductor analyzer, and the light source with continuously changing wavelength is provided by a Zolix tunable 500-W arc lamplight.

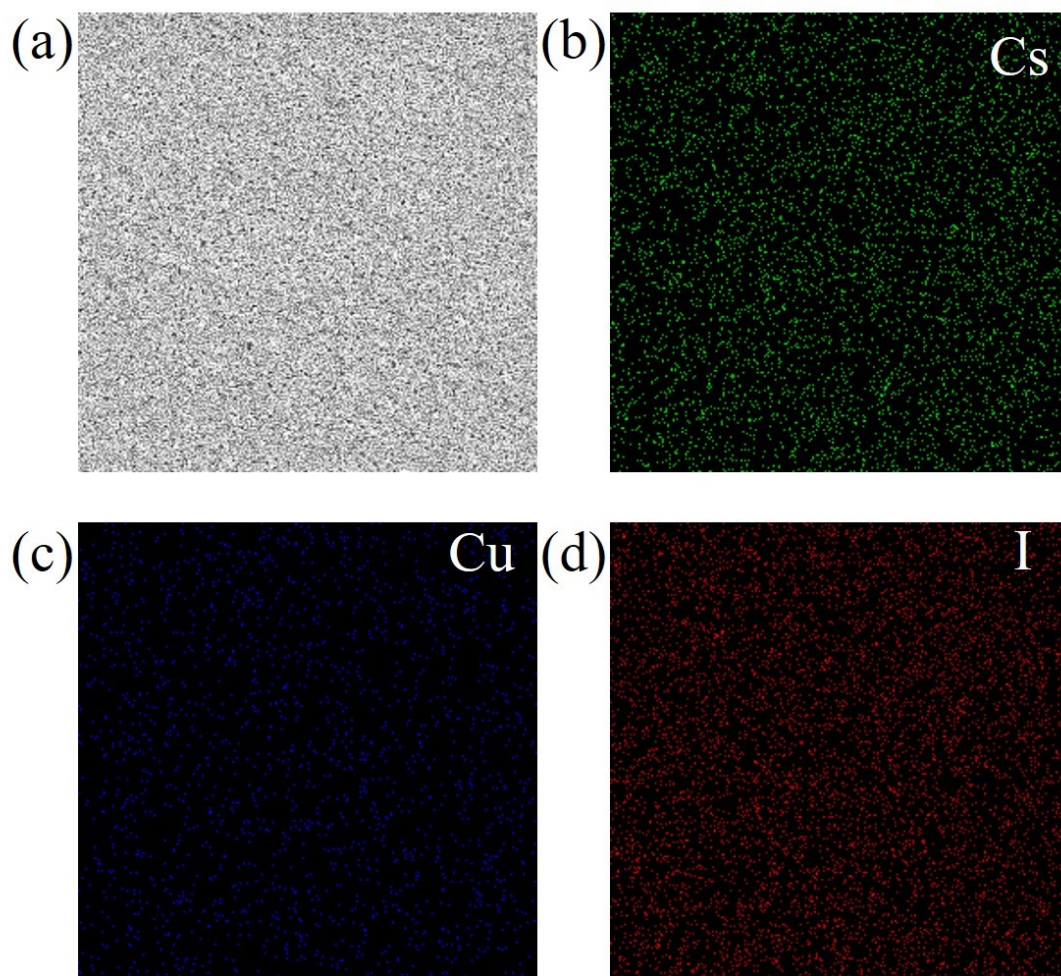

**Figure S1.** (a) SEM image of  $\text{Cs}_3\text{Cu}_2\text{I}_5$  thin films. (b-d) EDS results of  $\text{Cs}_3\text{Cu}_2\text{I}_5$  film.

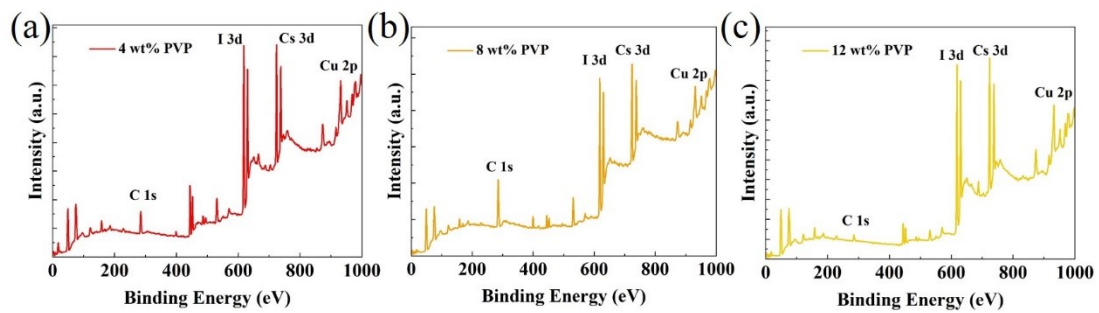

**Figure S2.** Total XPS spectrum of the prepared (a) 4, (b) 8 and (c) 12 wt% PVP- $\text{Cs}_3\text{Cu}_2\text{I}_5$  film.

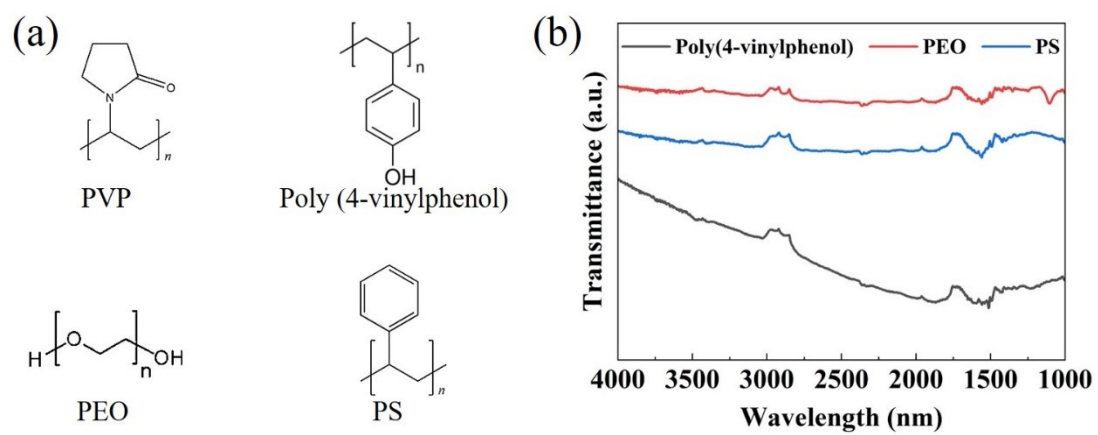

**Figure S3.** (a) Structure of different polymers. (b) FT-IR spectra of  $\text{Cs}_3\text{Cu}_2\text{I}_5$  film with different polymers.

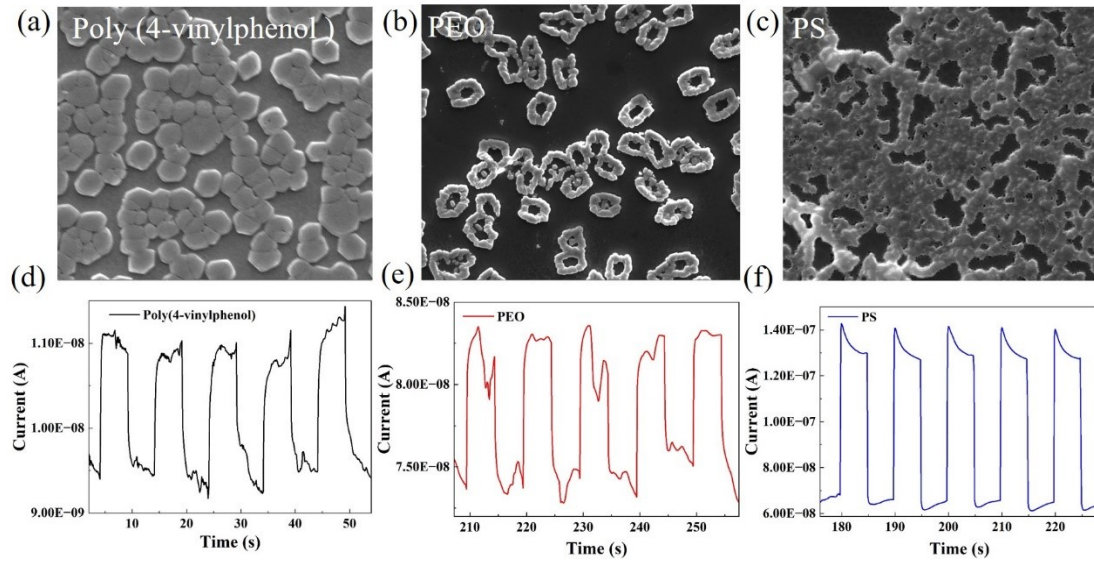

**Figure S4.** (a-c) SEM spectra of Cs<sub>3</sub>Cu<sub>2</sub>I<sub>5</sub> with different polymers film. (d-f) Response curve of Cs<sub>3</sub>Cu<sub>2</sub>I<sub>5</sub> with different polymers film.

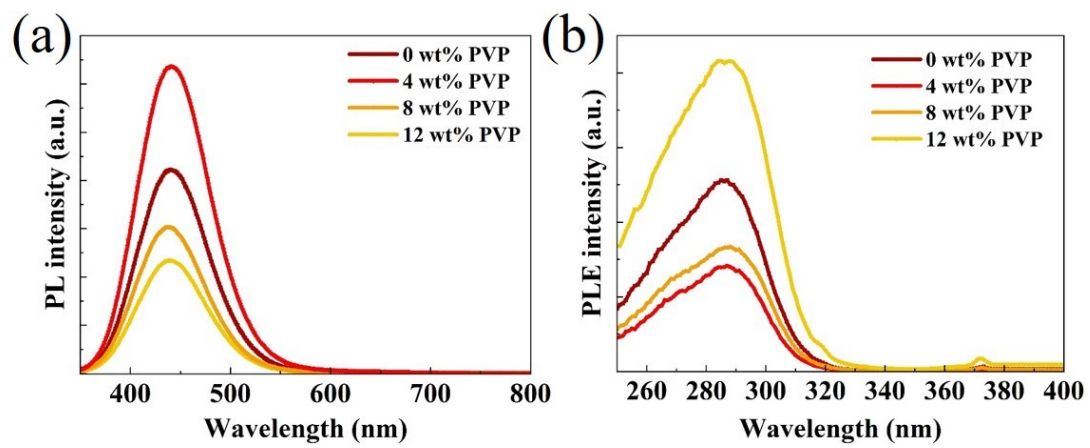

**Figure S5.** (a) PL spectrum, (b) PLE spectrum of 0, 4, 8 and 12 wt% PVP-Cs<sub>3</sub>Cu<sub>2</sub>I<sub>5</sub> films.



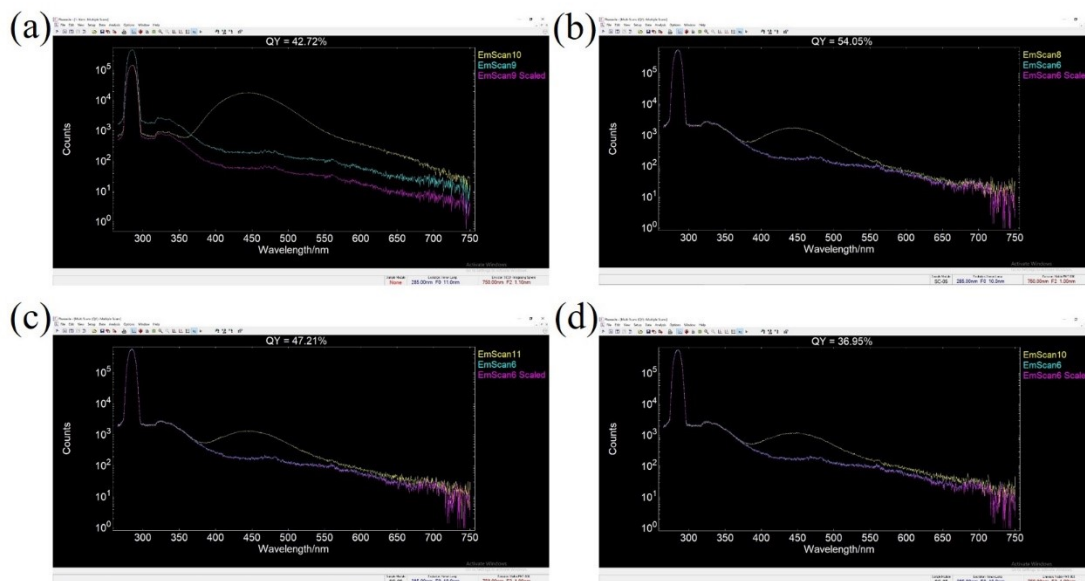

**Figure S6.** PLQY of the prepared (a) 0, (b) 4, (c) 8 and (d) 12 wt% PVP-Cs<sub>3</sub>Cu<sub>2</sub>I<sub>5</sub> film.

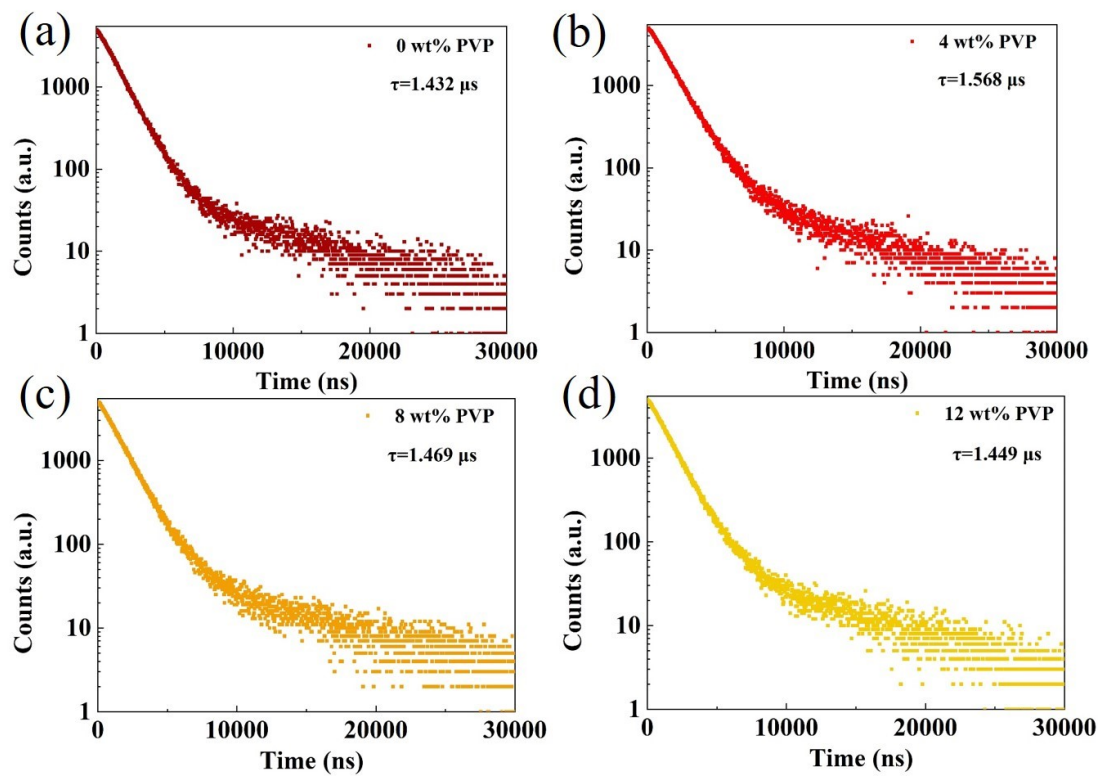

**Figure S7.** TRPL of the prepared (a) 0, (b) 4, (c) 8 and (d) 12 wt% PVP- $\text{Cs}_3\text{Cu}_2\text{I}_5$  film.

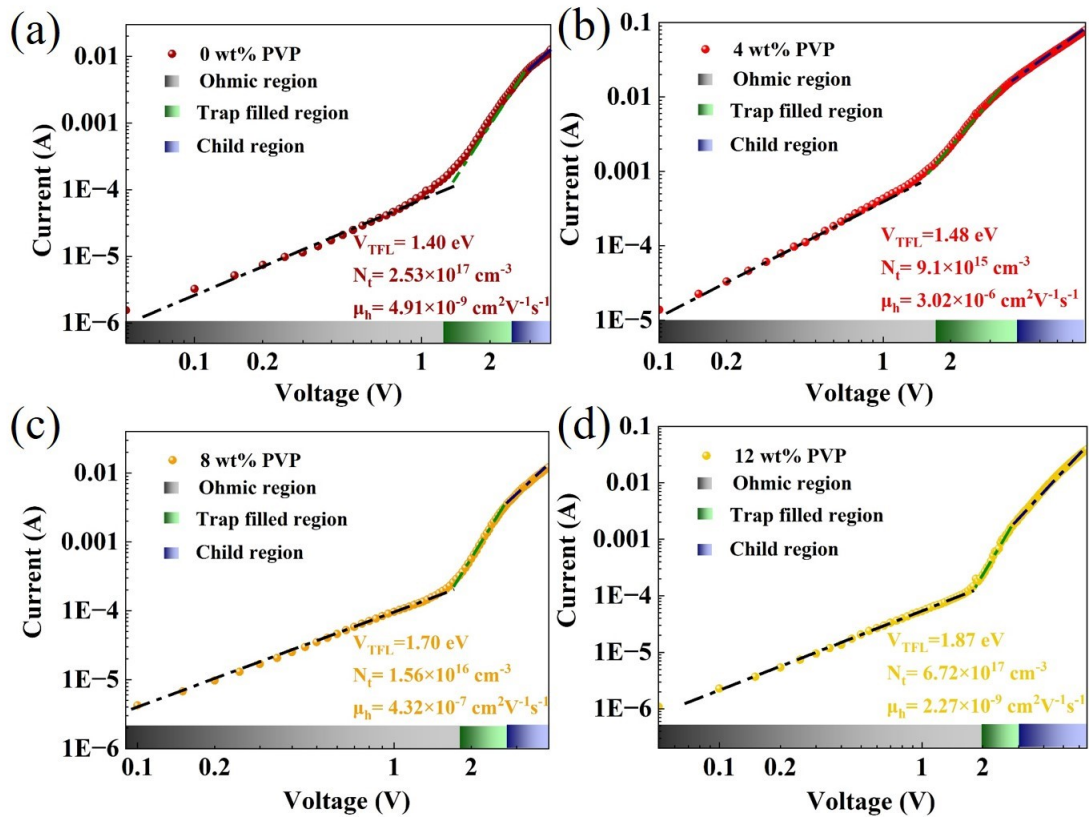

**Figure S8.** Double logarithmic current density–voltage curves of the hole-only devices based on (a) 0, (b) 4, (c) 8 and (d) 12 wt% PVP-Cs<sub>3</sub>Cu<sub>2</sub>I<sub>5</sub> films.

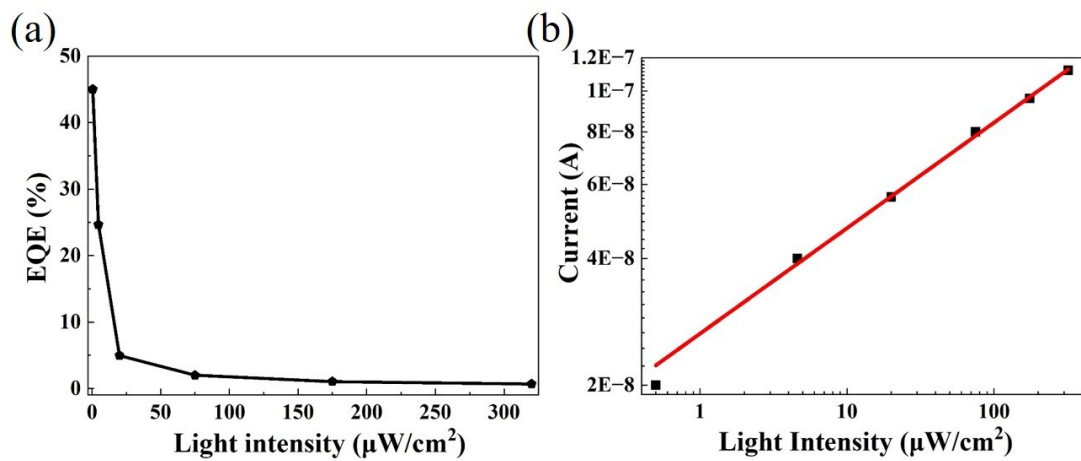

**Figure S9.** (a) Dependence of EQE upon intensity (bias voltage=1 V). (b) Logarithmic plot of the photocurrent versus light intensity.

**Table S1. Summary on copper-based halides photodetector.**

| <b>Materials</b>                                                                 | <b>Range of response</b> | <b>R</b>       | <b>D*</b>                         | <b>Reference</b> |
|----------------------------------------------------------------------------------|--------------------------|----------------|-----------------------------------|------------------|
| <b>Cs<sub>3</sub>Cu<sub>2</sub>I<sub>5</sub>@PVP film</b>                        | <b>200-263 nm</b>        | <b>0.5 A/W</b> | <b>1.85×10<sup>12</sup> Jones</b> | <b>This work</b> |
| Cs <sub>3</sub> Cu <sub>2</sub> I <sub>5</sub> film                              | 200-300 nm               | 17.8 A/W       | 1.12×10 <sup>12</sup> Jones       | 1                |
| Cs <sub>3</sub> Cu <sub>2</sub> I <sub>5</sub> crystalline film                  | 200-380 nm               | 0.0649 A/W     | 6.9×10 <sup>11</sup> Jones        | 2                |
| Cs <sub>3</sub> Cu <sub>2</sub> I <sub>5</sub> /β-Ga <sub>2</sub> O <sub>3</sub> | 200-280 nm               | 0.0023<br>mA/W | 10 <sup>8</sup> Jones             | 3                |
| Cs <sub>3</sub> Cu <sub>2</sub> I <sub>5</sub> /GaN                              | 300-370 nm               | 0.28 A/W       | 1.4×10 <sup>12</sup> Jones        | 4                |
| Cs <sub>3</sub> Cu <sub>2</sub> Br <sub>5</sub> /GaN                             | 200-275 and 325-375 nm   | 0.005 mA/W     | 5.29×10 <sup>11</sup> Jones       | 5                |
| CsCu <sub>2</sub> I <sub>3</sub>                                                 | 200-360 nm               | 0.047 mA/W     | 2.58×10 <sup>12</sup> Jones       | 6                |
| Cs <sub>3</sub> Cu <sub>2</sub> Br <sub>5</sub> /ZnO                             | 200-380 nm               | 0.3 A/W        | 1.26×10 <sup>11</sup> Jones       | 7                |

## REFERENCES

1. Liang, W. Q.; Li, Y.; Ma, J. L.; Wang, Y.; Yan, J. J.; Chen, X.; Wu, D.; Tian, Y. T.; Li, X. J.; Shi, Z. F., A Solution-Processed Ternary Copper Halide Thin Films for Air-Stable and Deep-Ultraviolet-Sensitive Photodetector. *Nanoscale* **2020**, *12*, 17213-17221.
2. Zhang, Z. X.; Li, C.; Lu, Y.; Tong, X. W.; Liang, F. X.; Zhao, X. Y.; Wu, D.; Xie, C.; Luo, L. B., Sensitive Deep Ultraviolet Photodetector and Image Sensor Composed of Inorganic Lead-Free Cs<sub>3</sub>Cu<sub>2</sub>I<sub>5</sub> Perovskite with Wide Bandgap. *J. Phys. Chem. Lett.* **2019**, *10*, 5343-5350.
3. Ma, J.; Xia, X.; Yan, S.; Li, Y.; Liang, W.; Yan, J.; Chen, X.; Wu, D.; Li, X.; Shi, Z., Stable and Self-Powered Solar-Blind Ultraviolet Photodetectors Based on a Cs<sub>3</sub>Cu<sub>2</sub>I<sub>5</sub>/Beta-Ga<sub>2</sub>O<sub>3</sub> Heterojunction Prepared by Dual-Source Vapor Codeposition. *ACS Appl. Mater. Interfaces* **2021**, *13*, 15409–15419.
4. Li, Y., et al., Highly Stable and Spectrum-Selective Ultraviolet Photodetectors Based on Lead-Free Copper-Based Perovskites. *Mater. Horiz.* **2020**, *7*, 530-540.
5. He, S.; Zhang, L.; Tian, D.; Zhou, Z.; Guo, A.; Xia, B.; Zhu, Y.; Zhao, F., Pulsed Laser Deposition of Lead-Free Cs<sub>3</sub>Cu<sub>2</sub>Br<sub>5</sub> Thin Films on GaN Substrate for Ultraviolet Photodetector Applications. *Journal of Alloys and Compounds* **2023**, 937.

6. Li, M.; Cao, C.; Liu, W.; Wang, N.; Yi, C.; Li, R.; Wang, J., Orientation Regulation of One-Dimensional CsCu<sub>2</sub>I<sub>3</sub> Perovskites for Visible-Blind Ultraviolet Photodetectors. *J. Phys. Chem. Lett.* **2022**, *13*, 6462-6467.
7. Zhao, X.; Tao, Y.; Dong, J.; Fang, Y.; Song, X.; Yan, Z., Cs<sub>3</sub>Cu<sub>2</sub>I<sub>5</sub>/ZnO Heterostructure for Flexible Visible-Blind Ultraviolet Photodetection. *ACS Appl Mater Interfaces* **2022**, *14*, 43490-43497.
